# Supplementary material for: Expert Validation and Refinement of a Tool for Assessing Patient Experiences with Deprescribing Interventions
Source: Research Square preprint supplement (doi:10.21203/rs.3.rs-7819002/v1), 2025-11-21
Supplement: Supplementary file 1 [file 83a3b8c2a5c391c56f4376a7.pdf]

## **Default Question Block**

Thank you for your feedback in the first round of the Delphi Survey. In this second round, we have developed survey items and would like your feedback on the clarity and relevance of each item.

Please rate each question for clarity; that is how clear you think the question will be for the patient, and relevance; that is how relevant the question is for measuring each of the constructs described below.

Comments can be added to the text boxes that appear in the comments column.

**In order to make it easy to complete the survey, we recommend that you use a computer not a mobile phone.**

## **CONSTRUCT 1: CHANGES IN MEDICATIONS**

These questions ask the patient about changes to their medications. Changes in medications can include adding a new medication, substituting one kind of medication for a different medication, or stopping a medication.

Please rate each question for clarity and relevance.

|                                                                                                                                                              | How clear are the following questions? |                       |                       |                       |                       | How relevant are the following questions? |                       |                       |                       |                       | Comments                                           |
|--------------------------------------------------------------------------------------------------------------------------------------------------------------|----------------------------------------|-----------------------|-----------------------|-----------------------|-----------------------|-------------------------------------------|-----------------------|-----------------------|-----------------------|-----------------------|----------------------------------------------------|
|                                                                                                                                                              | Not at all clear                       | A little clear        | Somewhat clear        | Very clear            | Extremely clear       | Not at all relevant                       | A little relevant     | Somewhat relevant     | Very relevant         | Extremely relevant    | Please enter your comments in the text boxes below |
| During your last visit with your provider, which of the following changes were made to your medication... a medication was changed to another one? ...Yes/No | <input type="radio"/>                  | <input type="radio"/> | <input type="radio"/> | <input type="radio"/> | <input type="radio"/> | <input type="radio"/>                     | <input type="radio"/> | <input type="radio"/> | <input type="radio"/> | <input type="radio"/> | <input type="text"/>                               |
| During your last visit with your provider, which of the following changes were made to your medication... a medication was added? ...Yes/No                  | <input type="radio"/>                  | <input type="radio"/> | <input type="radio"/> | <input type="radio"/> | <input type="radio"/> | <input type="radio"/>                     | <input type="radio"/> | <input type="radio"/> | <input type="radio"/> | <input type="radio"/> | <input type="text"/>                               |
| During your last visit with your provider, which of the following changes were made to your medication... a medication was stopped? ...Yes/No                | <input type="radio"/>                  | <input type="radio"/> | <input type="radio"/> | <input type="radio"/> | <input type="radio"/> | <input type="radio"/>                     | <input type="radio"/> | <input type="radio"/> | <input type="radio"/> | <input type="radio"/> | <input type="text"/>                               |
| Name of medication(s) that was changed.____ (text entry)                                                                                                     | <input type="radio"/>                  | <input type="radio"/> | <input type="radio"/> | <input type="radio"/> | <input type="radio"/> | <input type="radio"/>                     | <input type="radio"/> | <input type="radio"/> | <input type="radio"/> | <input type="radio"/> | <input type="text"/>                               |

CONSTRUCT 2: DEPRESCRIBING INTERVENTION VISIT

These questions are specifically about the patient's visit to discuss their medications with their provider.

Please rate each question for clarity and relevance.

|                                                                                                              | How clear are the following questions? |                       |                       |                       |                       | How relevant are the following questions? |                       |                       |                       |                       | Comments                                           |
|--------------------------------------------------------------------------------------------------------------|----------------------------------------|-----------------------|-----------------------|-----------------------|-----------------------|-------------------------------------------|-----------------------|-----------------------|-----------------------|-----------------------|----------------------------------------------------|
|                                                                                                              | Not at all clear                       | A little clear        | Somewhat clear        | Very clear            | Extremely clear       | Not at all relevant                       | A little relevant     | Somewhat relevant     | Very relevant         | Extremely relevant    | Please enter your comments in the text boxes below |
| How helpful was the visit to discuss your medications with the provider?                                     | <input type="radio"/>                  | <input type="radio"/> | <input type="radio"/> | <input type="radio"/> | <input type="radio"/> | <input type="radio"/>                     | <input type="radio"/> | <input type="radio"/> | <input type="radio"/> | <input type="radio"/> | <div></div>                                        |
| How much did the visit improve your understanding of the medication(s) you are taking?                       | <input type="radio"/>                  | <input type="radio"/> | <input type="radio"/> | <input type="radio"/> | <input type="radio"/> | <input type="radio"/>                     | <input type="radio"/> | <input type="radio"/> | <input type="radio"/> | <input type="radio"/> | <div></div>                                        |
| How well did you understand why you were asked to stop the medication(s)?                                    | <input type="radio"/>                  | <input type="radio"/> | <input type="radio"/> | <input type="radio"/> | <input type="radio"/> | <input type="radio"/>                     | <input type="radio"/> | <input type="radio"/> | <input type="radio"/> | <input type="radio"/> | <div></div>                                        |
| How often does your provider give you a list of your medications with noted changes at the end of the visit? | <input type="radio"/>                  | <input type="radio"/> | <input type="radio"/> | <input type="radio"/> | <input type="radio"/> | <input type="radio"/>                     | <input type="radio"/> | <input type="radio"/> | <input type="radio"/> | <input type="radio"/> | <div></div>                                        |

CONSTRUCT 3: MEDICATIONS

These questions are about the patient's medications.

Please rate each question for clarity and relevance.

|                                                                                       | How clear are the following questions? |                       |                       |                       |                       | How relevant are the following questions? |                       |                       |                       |                       | Comments                                           |
|---------------------------------------------------------------------------------------|----------------------------------------|-----------------------|-----------------------|-----------------------|-----------------------|-------------------------------------------|-----------------------|-----------------------|-----------------------|-----------------------|----------------------------------------------------|
|                                                                                       | Not at all clear                       | A little clear        | Somewhat clear        | Very clear            | Extremely clear       | Not at all relevant                       | A little relevant     | Somewhat relevant     | Very relevant         | Extremely relevant    | Please enter your comments in the text boxes below |
| How many prescription medications do you take? ____ (number entry)                    | <input type="radio"/>                  | <input type="radio"/> | <input type="radio"/> | <input type="radio"/> | <input type="radio"/> | <input type="radio"/>                     | <input type="radio"/> | <input type="radio"/> | <input type="radio"/> | <input type="radio"/> | <input type="text"/>                               |
| How many OTC medications do you take? ____ (number entry)                             | <input type="radio"/>                  | <input type="radio"/> | <input type="radio"/> | <input type="radio"/> | <input type="radio"/> | <input type="radio"/>                     | <input type="radio"/> | <input type="radio"/> | <input type="radio"/> | <input type="radio"/> | <input type="text"/>                               |
| How satisfied are you with the medication(s) that you take?                           | <input type="radio"/>                  | <input type="radio"/> | <input type="radio"/> | <input type="radio"/> | <input type="radio"/> | <input type="radio"/>                     | <input type="radio"/> | <input type="radio"/> | <input type="radio"/> | <input type="radio"/> | <input type="text"/>                               |
| How often do you find it hard to take all the medications that are prescribed to you? | <input type="radio"/>                  | <input type="radio"/> | <input type="radio"/> | <input type="radio"/> | <input type="radio"/> | <input type="radio"/>                     | <input type="radio"/> | <input type="radio"/> | <input type="radio"/> | <input type="radio"/> | <input type="text"/>                               |
| How often do you forget to take your medication(s) as prescribed?                     | <input type="radio"/>                  | <input type="radio"/> | <input type="radio"/> | <input type="radio"/> | <input type="radio"/> | <input type="radio"/>                     | <input type="radio"/> | <input type="radio"/> | <input type="radio"/> | <input type="radio"/> | <input type="text"/>                               |
| How often you experienced side effects from your medication(s)?                       | <input type="radio"/>                  | <input type="radio"/> | <input type="radio"/> | <input type="radio"/> | <input type="radio"/> | <input type="radio"/>                     | <input type="radio"/> | <input type="radio"/> | <input type="radio"/> | <input type="radio"/> | <input type="text"/>                               |

CONSTRUCT 4: HEALTH AND LIFESTYLE

These questions are about situation or life circumstances that improves or impedes their medication management.

Please rate each question for clarity and relevance.

|                                                                                             | How clear are the following questions? |                       |                       |                       |                       | How relevant are the following questions? |                       |                       |                       |                       | Comments                                           |
|---------------------------------------------------------------------------------------------|----------------------------------------|-----------------------|-----------------------|-----------------------|-----------------------|-------------------------------------------|-----------------------|-----------------------|-----------------------|-----------------------|----------------------------------------------------|
|                                                                                             | Not at all clear                       | A little clear        | Somewhat clear        | Very clear            | Extremely clear       | Not at all relevant                       | A little relevant     | Somewhat relevant     | Very relevant         | Extremely relevant    | Please enter your comments in the text boxes below |
| How often does your health condition make it hard to take your medication(s) as prescribed? | <input type="radio"/>                  | <input type="radio"/> | <input type="radio"/> | <input type="radio"/> | <input type="radio"/> | <input type="radio"/>                     | <input type="radio"/> | <input type="radio"/> | <input type="radio"/> | <input type="radio"/> | <div></div>                                        |
| How often does your lifestyle interfere with taking your medication(s) as prescribed?       | <input type="radio"/>                  | <input type="radio"/> | <input type="radio"/> | <input type="radio"/> | <input type="radio"/> | <input type="radio"/>                     | <input type="radio"/> | <input type="radio"/> | <input type="radio"/> | <input type="radio"/> | <div></div>                                        |
| How often does taking your medication(s) interfere with your day-to-day activities?         | <input type="radio"/>                  | <input type="radio"/> | <input type="radio"/> | <input type="radio"/> | <input type="radio"/> | <input type="radio"/>                     | <input type="radio"/> | <input type="radio"/> | <input type="radio"/> | <input type="radio"/> | <div></div>                                        |
| How important are your medication(s) to your overall health?                                | <input type="radio"/>                  | <input type="radio"/> | <input type="radio"/> | <input type="radio"/> | <input type="radio"/> | <input type="radio"/>                     | <input type="radio"/> | <input type="radio"/> | <input type="radio"/> | <input type="radio"/> | <div></div>                                        |
| How often do you fear you may get side effects from your medication(s)?                     | <input type="radio"/>                  | <input type="radio"/> | <input type="radio"/> | <input type="radio"/> | <input type="radio"/> | <input type="radio"/>                     | <input type="radio"/> | <input type="radio"/> | <input type="radio"/> | <input type="radio"/> | <div></div>                                        |

CONSTRUCT 5: UNDERSTANDING OF MEDICATION AND MANAGEMENT

These questions are about the patient's understanding of their medications and the help they need to manage their medications.

Please rate each question for clarity and relevance.

|                                                                                                      | How clear are the following questions? |                       |                       |                       |                       | How relevant are the following questions? |                       |                       |                       |                       | Comments                                           |
|------------------------------------------------------------------------------------------------------|----------------------------------------|-----------------------|-----------------------|-----------------------|-----------------------|-------------------------------------------|-----------------------|-----------------------|-----------------------|-----------------------|----------------------------------------------------|
|                                                                                                      | Not at all clear                       | A little clear        | Somewhat clear        | Very clear            | Extremely clear       | Not at all relevant                       | A little relevant     | Somewhat relevant     | Very relevant         | Extremely relevant    | Please enter your comments in the text boxes below |
| How would you rate your understanding of the need for your medication(s)?                            | <input type="radio"/>                  | <input type="radio"/> | <input type="radio"/> | <input type="radio"/> | <input type="radio"/> | <input type="radio"/>                     | <input type="radio"/> | <input type="radio"/> | <input type="radio"/> | <input type="radio"/> | <input type="text"/>                               |
| How helpful is having written information about your medications?                                    | <input type="radio"/>                  | <input type="radio"/> | <input type="radio"/> | <input type="radio"/> | <input type="radio"/> | <input type="radio"/>                     | <input type="radio"/> | <input type="radio"/> | <input type="radio"/> | <input type="radio"/> | <input type="text"/>                               |
| How often are your medication(s) instructions hard to understand?                                    | <input type="radio"/>                  | <input type="radio"/> | <input type="radio"/> | <input type="radio"/> | <input type="radio"/> | <input type="radio"/>                     | <input type="radio"/> | <input type="radio"/> | <input type="radio"/> | <input type="radio"/> | <input type="text"/>                               |
| How would you rate your ability to manage your medications?                                          | <input type="radio"/>                  | <input type="radio"/> | <input type="radio"/> | <input type="radio"/> | <input type="radio"/> | <input type="radio"/>                     | <input type="radio"/> | <input type="radio"/> | <input type="radio"/> | <input type="radio"/> | <input type="text"/>                               |
| How much support do you get from your family and friends in taking your medications as prescribed?   | <input type="radio"/>                  | <input type="radio"/> | <input type="radio"/> | <input type="radio"/> | <input type="radio"/> | <input type="radio"/>                     | <input type="radio"/> | <input type="radio"/> | <input type="radio"/> | <input type="radio"/> | <input type="text"/>                               |
| How much support do you get from your healthcare providers in taking your medications as prescribed? | <input type="radio"/>                  | <input type="radio"/> | <input type="radio"/> | <input type="radio"/> | <input type="radio"/> | <input type="radio"/>                     | <input type="radio"/> | <input type="radio"/> | <input type="radio"/> | <input type="radio"/> | <input type="text"/>                               |

CONSTRUCT 6: HEALTH CARE PROVIDERS

These questions are about the pharmacist, primary care provider, and specialist that the patient sees.

Please rate each question for clarity and relevance.

|                                                                                                              | How clear are the following questions? |                       |                       |                       |                       | How relevant are the following questions? |                       |                       |                       |                       | Comments                                           |
|--------------------------------------------------------------------------------------------------------------|----------------------------------------|-----------------------|-----------------------|-----------------------|-----------------------|-------------------------------------------|-----------------------|-----------------------|-----------------------|-----------------------|----------------------------------------------------|
|                                                                                                              | Not at all clear                       | A little clear        | Somewhat clear        | Very clear            | Extremely clear       | Not at all relevant                       | A little relevant     | Somewhat relevant     | Very relevant         | Extremely relevant    | Please enter your comments in the text boxes below |
| How hard is it to contact your pharmacist with questions about your medication(s)?                           | <input type="radio"/>                  | <input type="radio"/> | <input type="radio"/> | <input type="radio"/> | <input type="radio"/> | <input type="radio"/>                     | <input type="radio"/> | <input type="radio"/> | <input type="radio"/> | <input type="radio"/> | <input type="text"/>                               |
| How hard is it to contact your primary care provider with questions about your medication(s)?                | <input type="radio"/>                  | <input type="radio"/> | <input type="radio"/> | <input type="radio"/> | <input type="radio"/> | <input type="radio"/>                     | <input type="radio"/> | <input type="radio"/> | <input type="radio"/> | <input type="radio"/> | <input type="text"/>                               |
| How hard is it to contact your specialist with questions about your medication(s)?                           | <input type="radio"/>                  | <input type="radio"/> | <input type="radio"/> | <input type="radio"/> | <input type="radio"/> | <input type="radio"/>                     | <input type="radio"/> | <input type="radio"/> | <input type="radio"/> | <input type="radio"/> | <input type="text"/>                               |
| How often do you make other changes to your medication(s) on your own without consulting with your provider? | <input type="radio"/>                  | <input type="radio"/> | <input type="radio"/> | <input type="radio"/> | <input type="radio"/> | <input type="radio"/>                     | <input type="radio"/> | <input type="radio"/> | <input type="radio"/> | <input type="radio"/> | <input type="text"/>                               |

CONSTRUCT 7: VA SYSTEM

These questions are about how the VA system supports the patient with their medication.

Please rate each question for clarity and relevance.

|                                                                                                                                                         | How clear are the following questions? |                       |                       |                       |                       | How relevant are the following questions? |                       |                       |                       |                       | Comments                                           |
|---------------------------------------------------------------------------------------------------------------------------------------------------------|----------------------------------------|-----------------------|-----------------------|-----------------------|-----------------------|-------------------------------------------|-----------------------|-----------------------|-----------------------|-----------------------|----------------------------------------------------|
|                                                                                                                                                         | Not at all clear                       | A little clear        | Somewhat clear        | Very clear            | Extremely clear       | Not at all relevant                       | A little relevant     | Somewhat relevant     | Very relevant         | Extremely relevant    | Please enter your comments in the text boxes below |
| When you get a prescription order from a provider outside the VA, how often do you have difficulties getting the medication(s) through the VA pharmacy? | <input type="radio"/>                  | <input type="radio"/> | <input type="radio"/> | <input type="radio"/> | <input type="radio"/> | <input type="radio"/>                     | <input type="radio"/> | <input type="radio"/> | <input type="radio"/> | <input type="radio"/> | <div></div>                                        |
| How often do you have to get healthcare outside the VA?                                                                                                 | <input type="radio"/>                  | <input type="radio"/> | <input type="radio"/> | <input type="radio"/> | <input type="radio"/> | <input type="radio"/>                     | <input type="radio"/> | <input type="radio"/> | <input type="radio"/> | <input type="radio"/> | <div></div>                                        |
| How often do you have to get your medication(s) from a pharmacy outside the VA?                                                                         | <input type="radio"/>                  | <input type="radio"/> | <input type="radio"/> | <input type="radio"/> | <input type="radio"/> | <input type="radio"/>                     | <input type="radio"/> | <input type="radio"/> | <input type="radio"/> | <input type="radio"/> | <div></div>                                        |
| How often do you worry about the cost of your medication(s)?                                                                                            | <input type="radio"/>                  | <input type="radio"/> | <input type="radio"/> | <input type="radio"/> | <input type="radio"/> | <input type="radio"/>                     | <input type="radio"/> | <input type="radio"/> | <input type="radio"/> | <input type="radio"/> | <div></div>                                        |
| How often have you not filled your medication(s) due to the cost?                                                                                       | <input type="radio"/>                  | <input type="radio"/> | <input type="radio"/> | <input type="radio"/> | <input type="radio"/> | <input type="radio"/>                     | <input type="radio"/> | <input type="radio"/> | <input type="radio"/> | <input type="radio"/> | <div></div>                                        |

CONSTRUCT 8: PROVIDER WHO DISCUSSED MEDICATION(S) CHANGES

These questions are specifically about the healthcare provider that met with the patient to discuss the changes to their medication. This could have been a pharmacist, physician, physician assistant or nurse practitioner.

Please rate each question for clarity and relevance.





|                                                                                                                                 | How clear are the following questions? |                       |                       |                       |                       | How relevant are the following questions? |                       |                       |                       |                       | Comments                                                   |
|---------------------------------------------------------------------------------------------------------------------------------|----------------------------------------|-----------------------|-----------------------|-----------------------|-----------------------|-------------------------------------------|-----------------------|-----------------------|-----------------------|-----------------------|------------------------------------------------------------|
|                                                                                                                                 | Not at all clear                       | A little clear        | Somewhat clear        | Very clear            | Extremely clear       | Not at all relevant                       | A little relevant     | Somewhat relevant     | Very relevant         | Extremely relevant    | Please enter your comments in the text boxes below         |
| After your visit with your provider to discuss changes to your medication(s) how helpful would it be to have a follow-up visit? | <input type="radio"/>                  | <input type="radio"/> | <input type="radio"/> | <input type="radio"/> | <input type="radio"/> | <input type="radio"/>                     | <input type="radio"/> | <input type="radio"/> | <input type="radio"/> | <input type="radio"/> | <div style="border: 1px solid black; height: 30px;"></div> |

## CONSTRUCT 9: FOLLOW UP

These statements are yes/no responses to plans made for follow up after changes in the patient's medication(s).

Please rate each statement for clarity and relevance.

[illegible]

## CONSTRUCT 10: PERCEPTIONS WHEN MEDICATION WAS DISCONTINUED

These questions asks specifically about the discussion to stop a medication and the patient's thoughts or opinions on the importance of stopping.

Please rate each question for clarity and relevance.

[illegible]

|                                                                                                                        | How clear are the following questions? |                       |                       |                       |                       | How relevant are the following questions? |                       |                       |                       |                       | Comments                                           |
|------------------------------------------------------------------------------------------------------------------------|----------------------------------------|-----------------------|-----------------------|-----------------------|-----------------------|-------------------------------------------|-----------------------|-----------------------|-----------------------|-----------------------|----------------------------------------------------|
|                                                                                                                        | Not at all clear                       | A little clear        | Somewhat clear        | Very clear            | Extremely clear       | Not at all relevant                       | A little relevant     | Somewhat relevant     | Very relevant         | Extremely relevant    | Please enter your comments in the text boxes below |
| the stopped medication(s)?                                                                                             |                                        |                       |                       |                       |                       |                                           |                       |                       |                       |                       |                                                    |
| After your provider recently asked you to stop your medication(s), how often did you have any unwanted effects?        | <input type="radio"/>                  | <input type="radio"/> | <input type="radio"/> | <input type="radio"/> | <input type="radio"/> | <input type="radio"/>                     | <input type="radio"/> | <input type="radio"/> | <input type="radio"/> | <input type="radio"/> | <input type="text"/>                               |
| How has your health changed since you stopped the medication(s)? My health has gotten: (Worse to Better)               | <input type="radio"/>                  | <input type="radio"/> | <input type="radio"/> | <input type="radio"/> | <input type="radio"/> | <input type="radio"/>                     | <input type="radio"/> | <input type="radio"/> | <input type="radio"/> | <input type="radio"/> | <input type="text"/>                               |
| After the visit to discuss stopping your medication(s) how concerned are you about the number of medications you take? | <input type="radio"/>                  | <input type="radio"/> | <input type="radio"/> | <input type="radio"/> | <input type="radio"/> | <input type="radio"/>                     | <input type="radio"/> | <input type="radio"/> | <input type="radio"/> | <input type="radio"/> | <input type="text"/>                               |

**CONSTRUCT 11: SHARED DECISION WHEN MEDICATION WAS DISCONTINUED**

These questions asks about the patients agreement with the recommendation and how the provider involved them in making decisions about their medication(s).

Please rate each question for clarity and relevance.

|                                                                           | How clear are the following questions? |                       |                       |                       |                       | How relevant are the following questions? |                       |                       |                       |                       | Comments                                           |
|---------------------------------------------------------------------------|----------------------------------------|-----------------------|-----------------------|-----------------------|-----------------------|-------------------------------------------|-----------------------|-----------------------|-----------------------|-----------------------|----------------------------------------------------|
|                                                                           | Not at all clear                       | A little clear        | Somewhat clear        | Very clear            | Extremely clear       | Not at all relevant                       | A little relevant     | Somewhat relevant     | Very relevant         | Extremely relevant    | Please enter your comments in the text boxes below |
| How much did you agree with the decision to stop your medication(s)?      | <input type="radio"/>                  | <input type="radio"/> | <input type="radio"/> | <input type="radio"/> | <input type="radio"/> | <input type="radio"/>                     | <input type="radio"/> | <input type="radio"/> | <input type="radio"/> | <input type="radio"/> | <input type="text"/>                               |
| Did you stop the medication(s) as your provider asked you to? .... yes/no | <input type="radio"/>                  | <input type="radio"/> | <input type="radio"/> | <input type="radio"/> | <input type="radio"/> | <input type="radio"/>                     | <input type="radio"/> | <input type="radio"/> | <input type="radio"/> | <input type="radio"/> | <input type="text"/>                               |
| How involved were you in the decision to stop your medication(s)?         | <input type="radio"/>                  | <input type="radio"/> | <input type="radio"/> | <input type="radio"/> | <input type="radio"/> | <input type="radio"/>                     | <input type="radio"/> | <input type="radio"/> | <input type="radio"/> | <input type="radio"/> | <input type="text"/>                               |
| How satisfied were you with the decisions to stop your medication(s)?     | <input type="radio"/>                  | <input type="radio"/> | <input type="radio"/> | <input type="radio"/> | <input type="radio"/> | <input type="radio"/>                     | <input type="radio"/> | <input type="radio"/> | <input type="radio"/> | <input type="radio"/> | <input type="text"/>                               |
| How much did your provider pressure you to stop your medication(s)?       | <input type="radio"/>                  | <input type="radio"/> | <input type="radio"/> | <input type="radio"/> | <input type="radio"/> | <input type="radio"/>                     | <input type="radio"/> | <input type="radio"/> | <input type="radio"/> | <input type="radio"/> | <input type="text"/>                               |

CONSTRUCT 12: REASONS FOR DISCONTINUING MEDICATIONS

These statements are about the reasons the patient stopped the medication.

Please rate each statements/questions for clarity and relevance.

I stopped my medication(s) because... [Yes/No]

|                                                                                                             | How clear are the following questions? |                       |                       |                       |                       | How relevant are the following questions? |                       |                       |                       |                       | Comments                                           |
|-------------------------------------------------------------------------------------------------------------|----------------------------------------|-----------------------|-----------------------|-----------------------|-----------------------|-------------------------------------------|-----------------------|-----------------------|-----------------------|-----------------------|----------------------------------------------------|
|                                                                                                             | Not at all clear                       | A little clear        | Somewhat clear        | Very clear            | Extremely clear       | Not at all relevant                       | A little relevant     | Somewhat relevant     | Very relevant         | Extremely relevant    | Please enter your comments in the text boxes below |
| I stopped my medication(s) because... my provider asked me to stop. ... Yes/No                              | <input type="radio"/>                  | <input type="radio"/> | <input type="radio"/> | <input type="radio"/> | <input type="radio"/> | <input type="radio"/>                     | <input type="radio"/> | <input type="radio"/> | <input type="radio"/> | <input type="radio"/> | <input type="text"/>                               |
| I stopped my medication(s) because... my provider gave me reasons to stop. ... Yes/No                       | <input type="radio"/>                  | <input type="radio"/> | <input type="radio"/> | <input type="radio"/> | <input type="radio"/> | <input type="radio"/>                     | <input type="radio"/> | <input type="radio"/> | <input type="radio"/> | <input type="radio"/> | <input type="text"/>                               |
| I stopped my medication(s) because... I seem to be doing fine without the medication(s). ... Yes/No         | <input type="radio"/>                  | <input type="radio"/> | <input type="radio"/> | <input type="radio"/> | <input type="radio"/> | <input type="radio"/>                     | <input type="radio"/> | <input type="radio"/> | <input type="radio"/> | <input type="radio"/> | <input type="text"/>                               |
| I stopped my medication(s) because... my lab results supported stopping the medication(s). ... Yes/No       | <input type="radio"/>                  | <input type="radio"/> | <input type="radio"/> | <input type="radio"/> | <input type="radio"/> | <input type="radio"/>                     | <input type="radio"/> | <input type="radio"/> | <input type="radio"/> | <input type="radio"/> | <input type="text"/>                               |
| What are your other reasons for stopping your medication as instructed by your provider? _____ (text entry) | <input type="radio"/>                  | <input type="radio"/> | <input type="radio"/> | <input type="radio"/> | <input type="radio"/> | <input type="radio"/>                     | <input type="radio"/> | <input type="radio"/> | <input type="radio"/> | <input type="radio"/> | <input type="text"/>                               |
| After stopping the medication(s), did you restart it? ... Yes/No                                            | <input type="radio"/>                  | <input type="radio"/> | <input type="radio"/> | <input type="radio"/> | <input type="radio"/> | <input type="radio"/>                     | <input type="radio"/> | <input type="radio"/> | <input type="radio"/> | <input type="radio"/> | <input type="text"/>                               |
| What was your reason for restarting the medication(s)? _____(text entry)                                    | <input type="radio"/>                  | <input type="radio"/> | <input type="radio"/> | <input type="radio"/> | <input type="radio"/> | <input type="radio"/>                     | <input type="radio"/> | <input type="radio"/> | <input type="radio"/> | <input type="radio"/> | <input type="text"/>                               |

CONSTRUCT 13: REASONS FOR NOT DISCONTINUING MEDICATIONS

These statements are about the reasons the patient did not stop the medication.

Please rate each statements for clarity and relevance.

I did not stop my medication(s) because: Yes/No

|                                                                                                                            | How clear are the following questions? |                       |                       |                       |                       | How relevant are the following questions? |                       |                       |                       |                       | Comments                                           |
|----------------------------------------------------------------------------------------------------------------------------|----------------------------------------|-----------------------|-----------------------|-----------------------|-----------------------|-------------------------------------------|-----------------------|-----------------------|-----------------------|-----------------------|----------------------------------------------------|
|                                                                                                                            | Not at all clear                       | A little clear        | Somewhat clear        | Very clear            | Extremely clear       | Not at all relevant                       | A little relevant     | Somewhat relevant     | Very relevant         | Extremely relevant    | Please enter your comments in the text boxes below |
| I did not stop my medication(s) because ... I have no problem taking the pills. ... Yes/No                                 | <input type="radio"/>                  | <input type="radio"/> | <input type="radio"/> | <input type="radio"/> | <input type="radio"/> | <input type="radio"/>                     | <input type="radio"/> | <input type="radio"/> | <input type="radio"/> | <input type="radio"/> | <div></div>                                        |
| I did not stop my medication(s) because ... I had a bad experience in the past after stopping my medication(s). ... Yes/No | <input type="radio"/>                  | <input type="radio"/> | <input type="radio"/> | <input type="radio"/> | <input type="radio"/> | <input type="radio"/>                     | <input type="radio"/> | <input type="radio"/> | <input type="radio"/> | <input type="radio"/> | <div></div>                                        |
| I did not stop my medication(s) because ... I feel that all of my medication(s) are necessary/needed. ... Yes/No           | <input type="radio"/>                  | <input type="radio"/> | <input type="radio"/> | <input type="radio"/> | <input type="radio"/> | <input type="radio"/>                     | <input type="radio"/> | <input type="radio"/> | <input type="radio"/> | <input type="radio"/> | <div></div>                                        |
| I did not stop my medication(s) because ... I see no reason to stop my medication(s). ... Yes/No                           | <input type="radio"/>                  | <input type="radio"/> | <input type="radio"/> | <input type="radio"/> | <input type="radio"/> | <input type="radio"/>                     | <input type="radio"/> | <input type="radio"/> | <input type="radio"/> | <input type="radio"/> | <div></div>                                        |
| I did not stop my medication(s) because ... I do not agree with the reason to stop my medication(s). ... Yes/No            | <input type="radio"/>                  | <input type="radio"/> | <input type="radio"/> | <input type="radio"/> | <input type="radio"/> | <input type="radio"/>                     | <input type="radio"/> | <input type="radio"/> | <input type="radio"/> | <input type="radio"/> | <div></div>                                        |
| Other reasons_____ (text entry)                                                                                            | <input type="radio"/>                  | <input type="radio"/> | <input type="radio"/> | <input type="radio"/> | <input type="radio"/> | <input type="radio"/>                     | <input type="radio"/> | <input type="radio"/> | <input type="radio"/> | <input type="radio"/> | <div></div>                                        |
